# Supplementary material for: Optimisation of the marine Nd isotope scheme in the ocean component of the FAMOUS general circulation model
Source: Copernicus journal article supplement (doi:10.5194/egusphere-2022-937), 2022-10-07
Supplement: Supplementary file 1 [file Table_S1.xlsx]

## Sheet: parameter_values
UM identifier	fdust (g yr-1)	αriver	friv (g yr-1)	fsed (g yr-1)	[Nd]p/[Nd]d	ftotal (g yr-1)	Nd(I)	𝜏Nd
Historic reference simulations
XPDAD	330000000	1	440000000	4500000000	0.002	5270000000	8930000000000	1694
XPDAH	330000000	1	440000000	4500000000	0.003	5270000000	6010000000000	1140
XPDAE	330000000	1	440000000	4500000000	0.004	5270000000	4500000000000	854
XPDAF	330000000	1	440000000	4500000000	0.005	5270000000	3580000000000	679
XPDAG	330000000	1	440000000	4500000000	0.006	5270000000	2950000000000	560
XPDAI	330000000	1	440000000	4500000000	0.001	5270000000	14300000000000	2713
XPDAL	330000000	1	440000000	1500000000	0.003	2270000000	2510000000000	1106
XPDAM	330000000	1	440000000	3000000000	0.003	3770000000	3860000000000	1024
XPDAN	330000000	1	440000000	6000000000	0.003	6770000000	7740000000000	1143
XPDAU	330000000	1	440000000	6000000000	0.006	6770000000	3810000000000	562
XPDAV	330000000	3	1320000000	6000000000	0.006	7650000000	4210000000000	550
Wave 1
XPGTA	330000000	1	440000000	2450000000	0.002	3220000000	5210000000000	1617
XPGTB	330000000	1	440000000	3550000000	0.0047	4320000000	3110000000000	722
XPGTC	330000000	1	440000000	5270000000	0.0055	6040000000	3720000000000	616
XPGTD	330000000	1	440000000	1550000000	0.0017	2320000000	4230000000000	1828
XPGTE	330000000	1	440000000	3730000000	0.0035	4500000000	4380000000000	974
XPGTF	330000000	1	440000000	5450000000	0.0042	6220000000	5070000000000	815
XPGTG	330000000	1	440000000	1590000000	0.0056	2360000000	1380000000000	586
XPGTH	330000000	1	440000000	2910000000	0.0039	3680000000	3190000000000	868
Wave 2
XPHJA	330000000	3.53	1550000000	1500000000	0.0044	3380000000	2410000000000	713
XPHJB	330000000	2.11	926000000	4820000000	0.0052	6080000000	3910000000000	643
XPHJC	330000000	2.89	1270000000	4110000000	0.0044	5710000000	4300000000000	753
XPHJD	330000000	3.84	1690000000	3160000000	0.0055	5180000000	3020000000000	583
XPHJE	330000000	2.42	1070000000	1740000000	0.006	3140000000	1660000000000	528
XPHJF/REF_CONC2	330000000	3.53	1550000000	1500000000	0.0023	3380000000	4540000000000	1341
XPHJG	330000000	2.26	996000000	6000000000	0.0036	7330000000	6900000000000	942
XPHJH	330000000	3.21	1410000000	4580000000	0.0023	6320000000	8950000000000	1415
XPHJI	330000000	3.84	1690000000	6000000000	0.0021	8020000000	12300000000000	1538
XPHJJ	330000000	2.42	1070000000	1500000000	0.0039	2900000000	2380000000000	822
XPHJK	330000000	1.79	787000000	3160000000	0.006	4280000000	2340000000000	547
XPHJL	330000000	2.11	926000000	3630000000	0.0031	4890000000	5260000000000	1077
XPHJM	330000000	4	1760000000	4820000000	0.006	6910000000	3730000000000	540
XPHJN	330000000	3.84	1690000000	4110000000	0.0036	6130000000	5600000000000	914
XPHJO	330000000	3.68	1620000000	5760000000	0.0039	7710000000	6590000000000	855
REF simulation
XPIAB/REF	330000000	4	1760000000	3780000000	0.0045	5870000000	4270000000000	727
XPIAC/REF_IC	330000000	4	1760000000	2360000000	0.0045	4450000000	3160000000000	711
XPIAD/REF_CONC	330000000	4	1760000000	1500000000	0.00196	3590000000	5510000000000	1534
